# Supplementary material for: How cells determine the number of polarity sites
Source: eLife journal article supplement (doi:10.7554/elife.58768), 2021-04-26
Supplement: supp [file elife-58768-supp-v1.zip]

Archive with 14 entries (14 files):
- elife_poa_e58768_Figure_1_figure_supplement_1.pdf
- elife_poa_e58768_Figure_2_figure_supplement_1.pdf
- elife_poa_e58768_Figure_2_figure_supplement_2.pdf
- elife_poa_e58768_Figure_3_figure_supplement_1.pdf
- elife_poa_e58768_Figure_3_figure_supplement_2.pdf
- elife_poa_e58768_Figure_3_figure_supplement_3.pdf
- elife_poa_e58768_Figure_4_figure_supplement_1.pdf
- elife_poa_e58768_Figure_4_figure_supplement_2.pdf
- elife_poa_e58768_Figure_5_figure_supplement_1.pdf
- elife_poa_e58768_Figure_6_figure_supplement_1.pdf
- elife_poa_e58768_Video_1.avi
- elife_poa_e58768_Source_code_1.zip
- elife_poa_e58768_Source_code_2.zip
- elife_poa_e58768_Transparent_Reporting_File.docx
