# Supplementary material for: How cells determine the number of polarity sites
Source: eLife journal article supplement (doi:10.7554/elife.58768), 2021-04-26
Supplement: supp [file elife-58768-supp-v1.zip › elife_poa_e58768_Figure_5_figure_supplement_1.pdf]

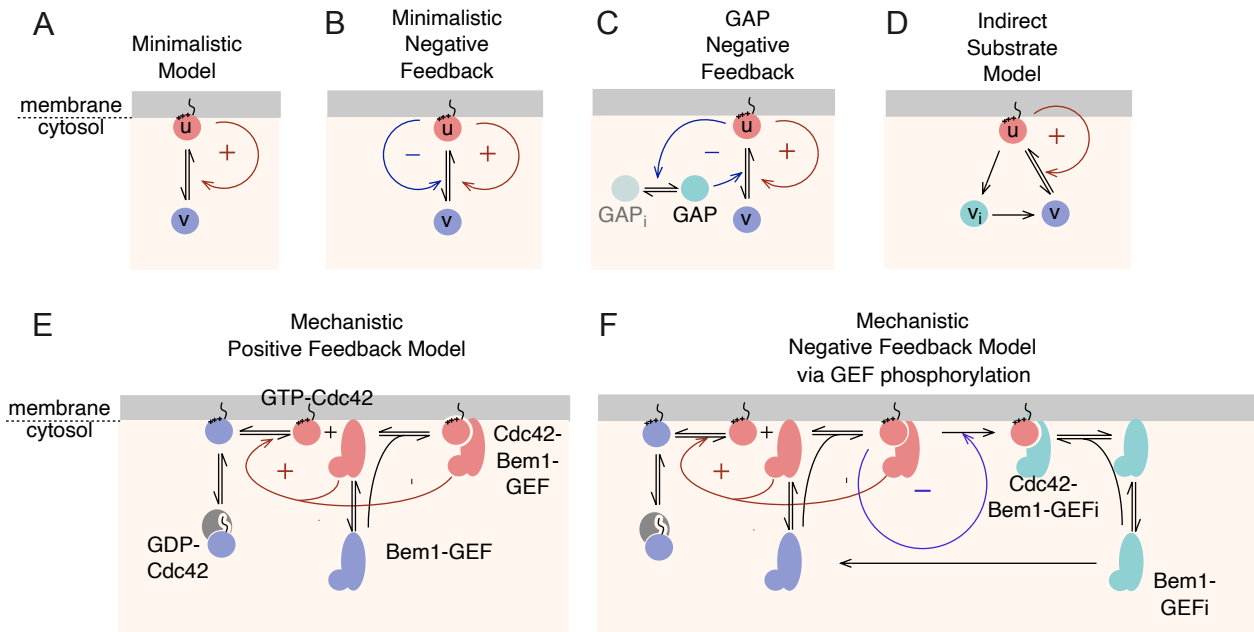

**G**

| Model Name               | Panel | Positive Feedback | Competition/Coexistence | Negative Feedback | Indirect Substrate | Equalization | Reference                  |
|--------------------------|-------|-------------------|-------------------------|-------------------|--------------------|--------------|----------------------------|
| Minimalistic Model       | A     | ✓                 | ✓                       |                   |                    |              | <i>Chiou et al., 2018</i>  |
| Minimalistic NF Model    | B     | ✓                 | ✓                       | ✓                 |                    |              | <i>Chiou et al., 2018</i>  |
| GAP NF Model             | C     | ✓                 | ✓                       | ✓                 | ✓                  | ✓            | <i>Jacobs et al., 2019</i> |
| Indirect Substrate Model | D     | ✓                 | ✓                       |                   | ✓                  | ✓            | <i>This study</i>          |
| Mechanistic PF Model     | E     | ✓                 | ✓                       |                   |                    |              | <i>Wu et al., 2015</i>     |
| Mechanistic NF Model     | F     | ✓                 | ✓                       | ✓                 | ✓                  | ✓            | <i>Kuo et al., 2014</i>    |
