# Supplementary figures and images for: How cells determine the number of polarity sites
Source: eLife journal article supplement (doi:10.7554/elife.58768), 2021-04-26

## A Bem1

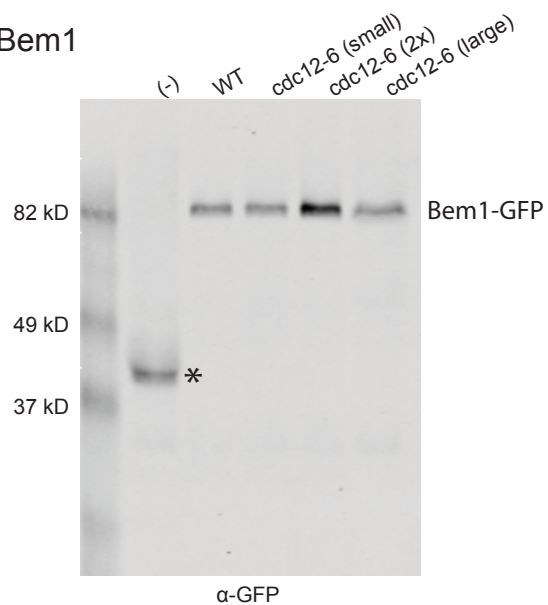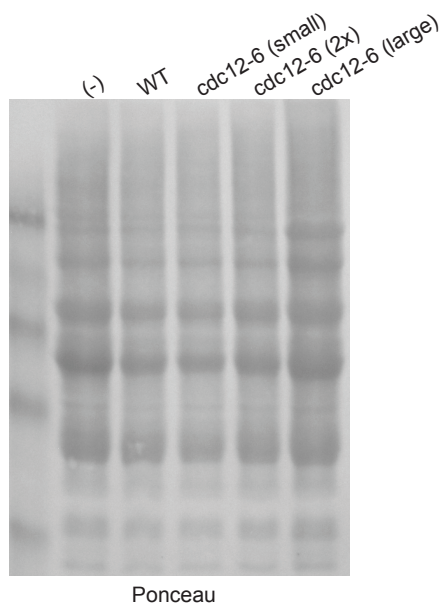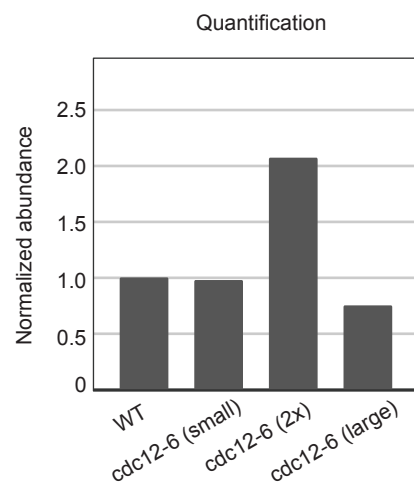

## B Cdc24

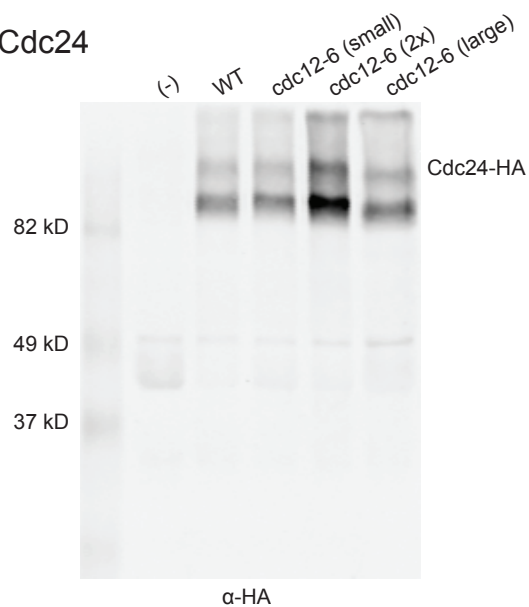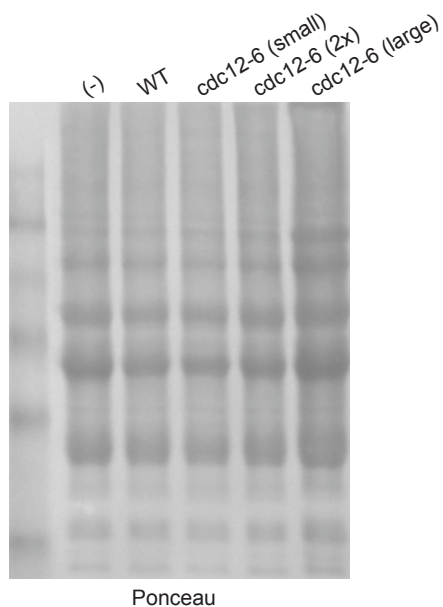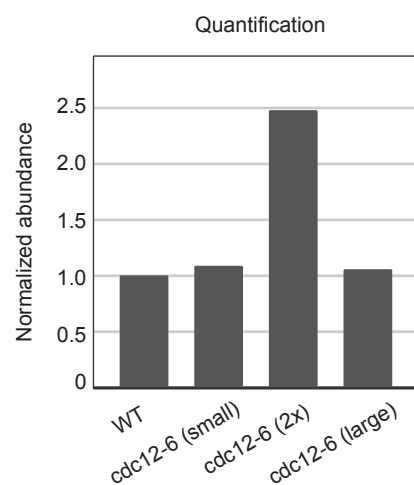

## C Cdc42

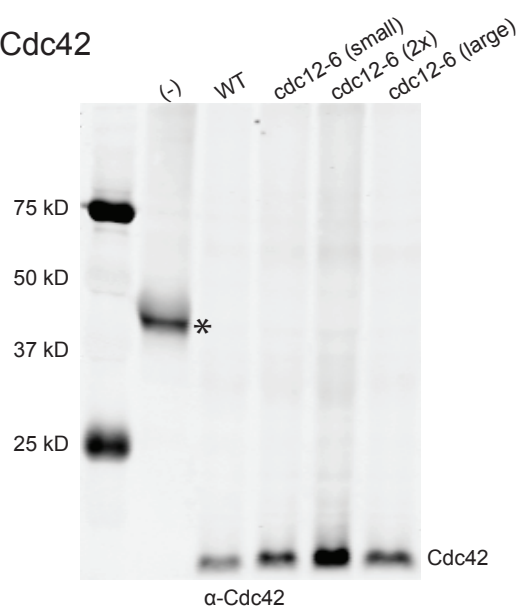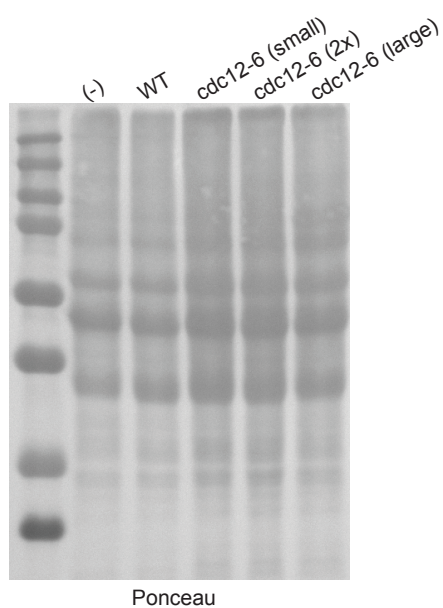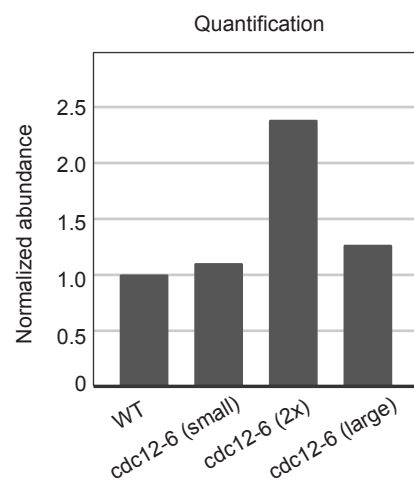

Supplement: supp [file elife-58768-supp-v1.zip]

**A**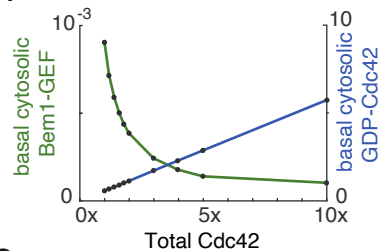**B**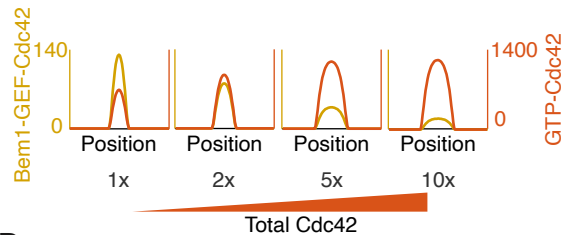**C**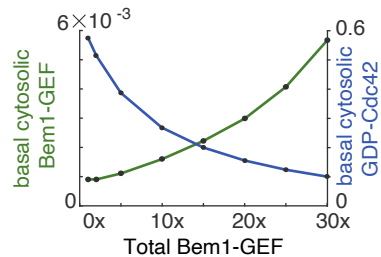**D**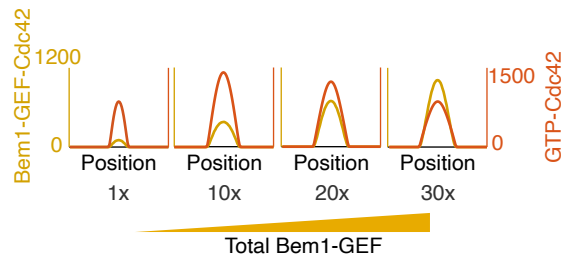

Supplement: supp [file elife-58768-supp-v1.zip]

Percentage of 2-budded cells

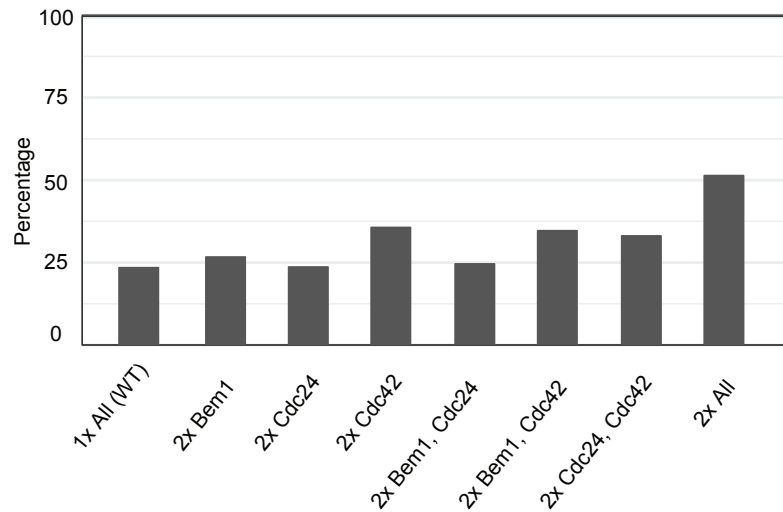

Supplement: supp [file elife-58768-supp-v1.zip]

A

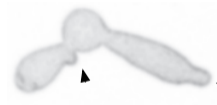

2 buds

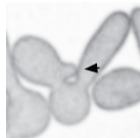

1 bud

*cdc12-6;*  
*PSR1(28aa)-GFP*

B

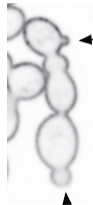

2 buds

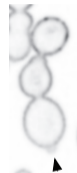

1 bud

*pGal1-IQG1;*  
*PSR1(28aa)-GFP*

Supplement: supp [file elife-58768-supp-v1.zip › elife_poa_e58768_Figure_2_figure_supplement_1.pdf]

A

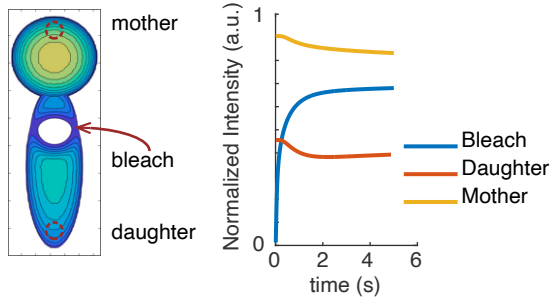

B

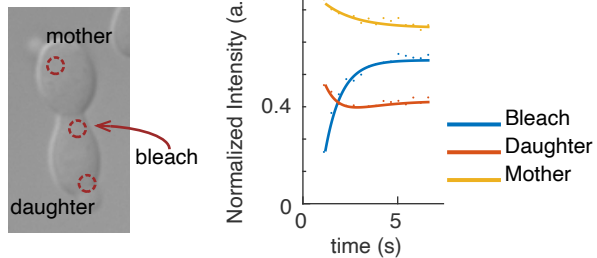

C

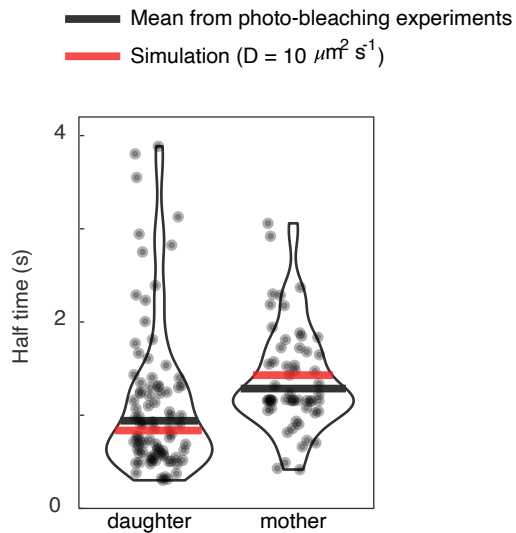

Supplement: supp [file elife-58768-supp-v1.zip › elife_poa_e58768_Figure_2_figure_supplement_2.pdf]

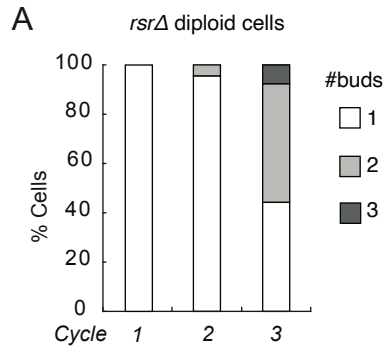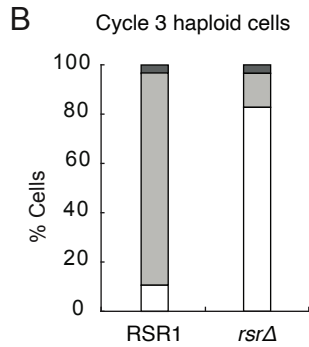

Supplement: supp [file elife-58768-supp-v1.zip › elife_poa_e58768_Figure_3_figure_supplement_1.pdf]

A

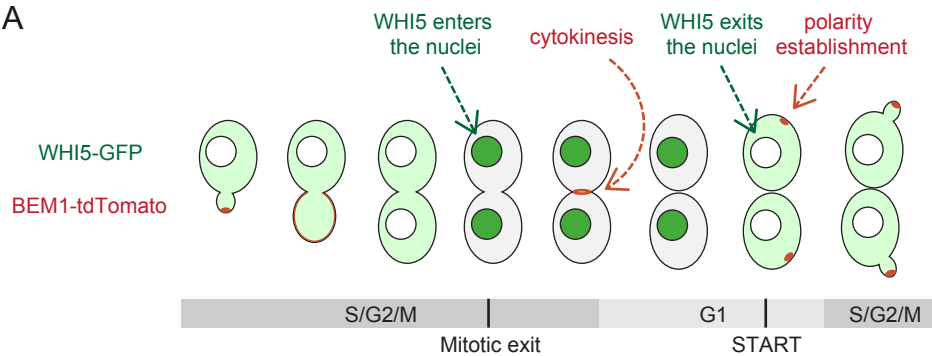

B

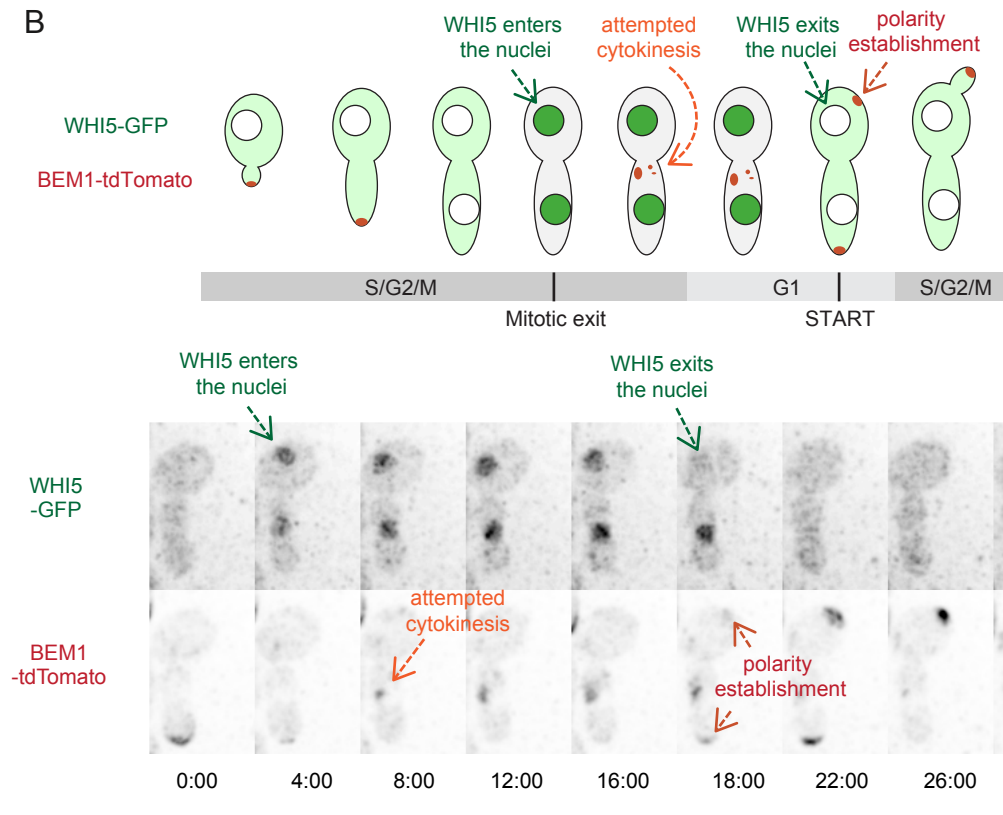

Supplement: supp [file elife-58768-supp-v1.zip › elife_poa_e58768_Figure_3_figure_supplement_2.pdf]

A

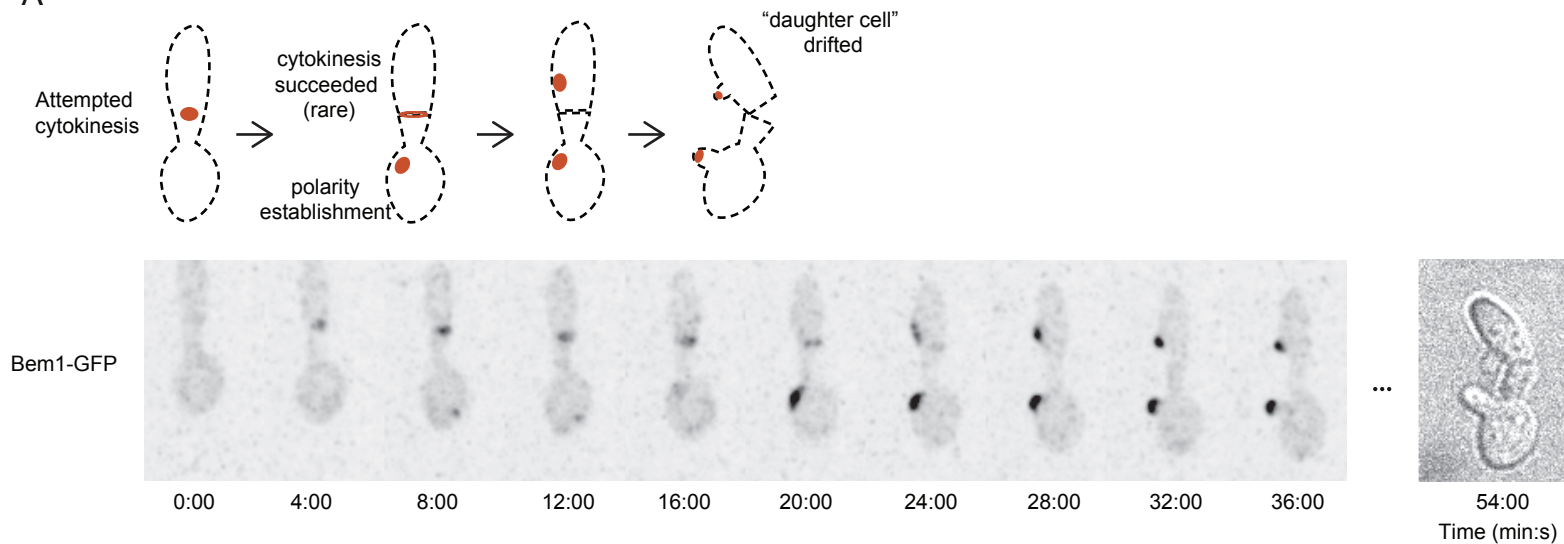

B

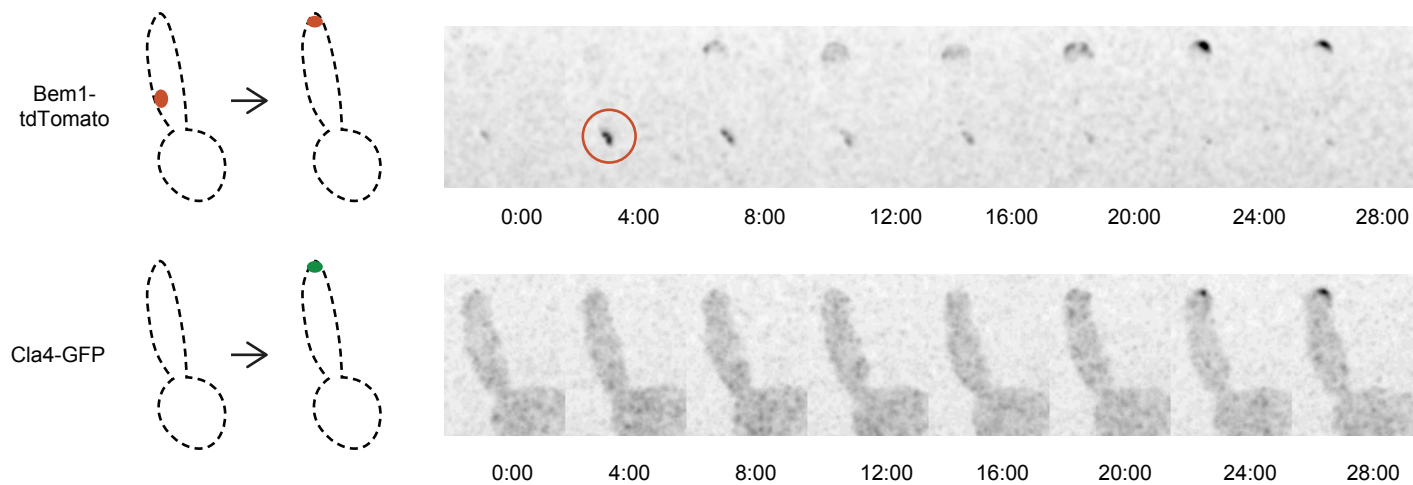

Supplement: supp [file elife-58768-supp-v1.zip › elife_poa_e58768_Figure_3_figure_supplement_3.pdf]

## A Competition

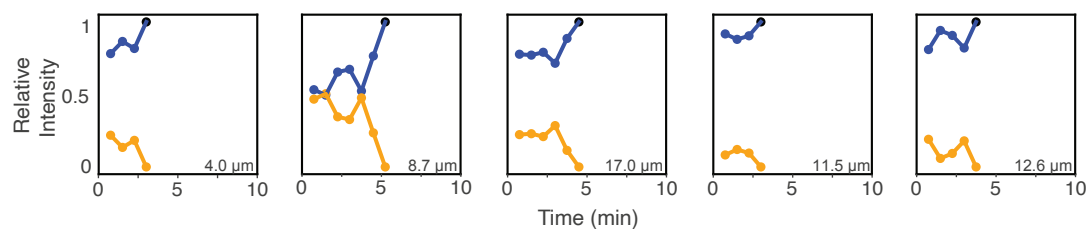

## Aborted Competition

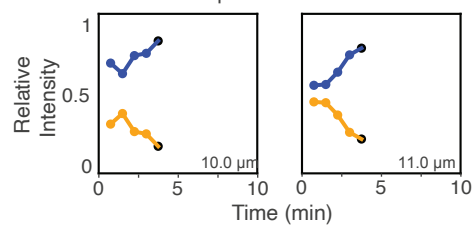

## Coexistence

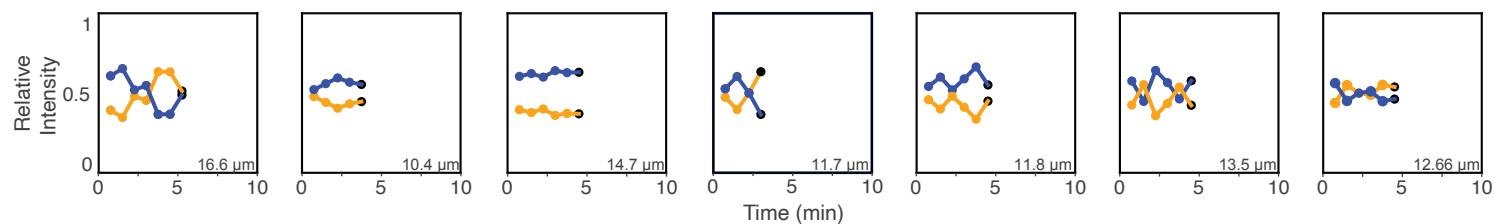

## Equalization

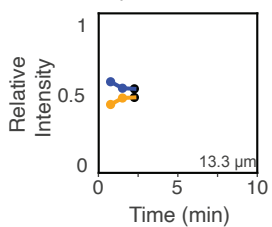

## B

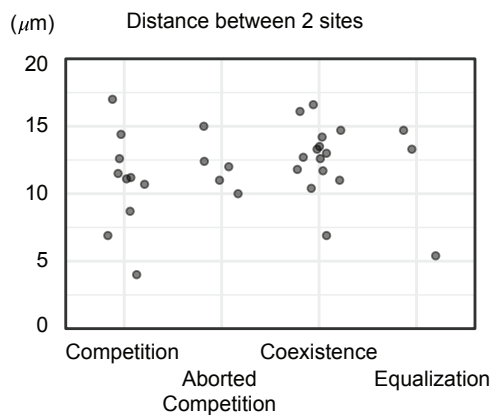

Supplement: supp [file elife-58768-supp-v1.zip › elife_poa_e58768_Figure_6_figure_supplement_1.pdf]
